# Supplementary material
Source: Research Square preprint supplement (doi:10.21203/rs.3.rs-9147375/v1)
Supplement: Supplementary file 1 [file 786db8236e321bf53e283a83.docx]

**The references marked with an asterisk (*) correspond to literary sources retrieved from the *Human Relations Area Files* (HRAF), and they are as follows:**

Abu-Lughod, L. (1986). *Veiled sentiments: honor and poetry in a Bedouin society*. University of California Press.

Aschwanden, H. & U. Cooper. (1987). Symbols of Death: An Analysis of the Consciousness of the Karanga. In *Shona Heritage Series*, 389. Gweru, Zimbabwe: Mambo Press. <https://ehrafworldcultures.yale.edu/document?id=fs05-021>

Alessandrini, A. P. (1986). Beyond the “Godfather” image: the role of Italian-Americans in the development of America. In *The Italian Americans through the Generations* (pp. 157–168). American Italian Historical Association. <https://ehrafworldcultures-yale-edu.are.uab.cat/document?id=n010-011>

Alvarsson, J., & Beierle, J. (1997). *Culture summary: Mataco*. HRAF. <https://ehrafworldcultures-yale-edu.are.uab.cat/document?id=si07-000>

Ancelet, B. J. (1989). Cajun music: its origin and development. In Louisiana life series (Issue 2, pp. 58, [8] of plates). Center for Louisiana Studies. <https://ehrafworldcultures.yale.edu/document?id=no12-015>

Beardsley, R. K., Hall, J. W., & Ward, R. E. (1972). *Village Japan*. University of Chicago Press.

Beckwith, M. W., & Loumala, K. (1970). *Hawaiian mythology*. University of Hawaii Press.

Befu, H. (1970). An Ethnographic Sketch of Old Harbor, Kodiak: An Eskimo Village. *Arctic Anthropology, 6*(2): 29–42.

Bell Sir, C. A. (1931). *The religion of Tibet*. Clarendon Press.

Benet, S. (1974). Abkhasians: the long-living people of the Caucasus. In *Case studies in cultural anthropology* (pp. xiv, 112). Holt, Rinehart and Winston. <https://ehrafworldcultures.yale.edu/document?id=ri03-005>

Bennett, W. C., & Zingg, R. M. (1935). The Tarahumara: An Indian tribe of northern Mexico. In *Ethnological series* (pp. xix, 412 , plates). The University of Chicago Press. https://ehrafworldcultures.yale.edu/document?id=nu33-001

Benton-Banai, E. (1979). *The Mishomis book: the voice of the Ojibway*. Indian Country Press.

Berque, J., & Bigwood, J. (1955). *Social structures of the High Atlas*. Presses Universitaires de France.

Bianchi, C. C. (1989). *Gubida illness and religious ritual among the Garifuna of Santa Fe, Honduras: an ethnopsychiatric analysis*. University Microfilms International. https://ehrafworldcultures.yale.edu/document?id=sa12-016

Blackman, M. B. (1990). Haida: Traditional culture. In *Handbook of North American indians. northwest* (Vol. 7, pp. 240–260). Smithsonian Institution: For sale by the Supt. of Docs., U.S. G.P.O. <https://ehrafworldcultures.yale.edu/document?id=ne09-005>

Bogoraz-Tan, W., Vladimir Germanovich (1904 [Part 1]; 1907 [Part 2]; 1909 [Part 3]//). The Chukchee: material culture [part 1], religion [part 2], social organization [part 3]. In *Memoirs: Vol. XI* (pp. xvii, 733, 35 plates [HRAF pagination-incomplete]). E. J. Brill, Ltd. ; G. E. Stechert and Co. <https://ehrafworldcultures.yale.edu/document?id=ry02-001>

Boonzaier, E. (2010). *Culture Summary: Khoi*. Human Relations Area Files. <https://ehrafworldcultures.yale.edu/document?id=fx13-000>

Burrows, E. G. & Spiro, M. E. (1953). An atoll culture: ethnography of Ifaluk in the central Carolines. In *Behavior science monographs* (pp. iii, 355). Human Relations Area Files. https://ehrafworldcultures.yale.edu/document?id=or21-042

Calame-Griaule, G. (1986). *Words and the Dogon world.* Institute for the Study of Human Issues.

Campbell, J. K., & Sherrard, P. (1968). Modern Greece. In *Nations of the modern world* (p. 426). Praeger. <https://ehrafworldcultures.yale.edu/document?id=eh01-090>

Carrier, A. H., and Carrier, J.G. (1991). *Structure and Process in a Melanesian Society: Ponam’s Progress in the Twentieth Century*. Harwood Academic Publishers.

Castelli, J. R. (1970). *Basques in the western United States: a functional approach to determination of cultural presence in the geographic landscape*. University Microfilms, A Xerox Company. <https://ehrafworldcultures.yale.edu/document?id=n018-002>

Chagnon, N. A. (1968). Ya̦nomamö, the fierce people: the fierce people. In *Case studies in cultural anthropology*. Holt, Rinehart and Winston.

Chapelle, J., & Schütze, F. (1957). *Black nomads of the Sahara*. Librairie Plon. <https://ehrafworldcultures.yale.edu/document?id=ms22-008>

Chapman, A. (1982). *Drama and power in a hunting society: the Selk’ of Tierra del Fuego*. Cambridge University Press.

Chavez, L. R. (1998). Shadowed lives: undocumented immigrants in American society. In *Case studies in cultural anthropology* (pp. xvii, 222). Harcourt Brace College Publishers. <https://ehrafworldcultures.yale.edu/document?id=n007-036>

Cohen, R. (1960). *The structure of Kanuri society*. University Microfilms. <https://ehrafworldcultures.yale.edu/document?id=ms14-003>

Coleman, J. D. B. (1984). *Language shift in a bilingual Hebridean crofting community*. Xerox University Microfilms. <https://ehrafworldcultures.yale.edu/document?id=es10-015>

Condon, R. G. (1988). Inuit youth: Growth and change in the Canadian arctic. Rutgers University Press.

Courlander, H. (1987). *The fourth world of the Hopis*. University of New Mexico Press.

Cox, F. M., & Mberia, N. (2004). Aging and elderhood. In *ngecha : a kenyan village in a time of rapid social change* (pp. 179–214). University of Nebraska Press. https://ehrafworldcultures.yale.edu/document?id=fl10-023

Creel, M. W. (1988). *“A peculiar people”: slave religion and community-culture among the Gullahs*. New York University Press. <https://ehrafworldcultures.yale.edu/document?id=nn23-003>

Crocker, W. H. (William H. (1990). The Canela (Eastern Timbira), I: an ethnographic introduction. In *Smithsonian contributions to anthropology* (Issue 33, pp. xix, 487). Smithsonian Institution Press. <https://ehrafworldcultures.yale.edu/document?id=so08-005>

Davison, Jean. 2010. “Culture Summary: Gikuyu.” New Haven, Conn.: Human Relations Area Files. <https://ehrafworldcultures.yale.edu/document?id=fl10-000>

De Coccola, R., King, P., & Houston, J. (1986). The incredible Eskimo: life among the barren land Eskimo. Hancock House.

Densmore, F. (1913). *Chippewa music: volume 2*. Govt. print. off. <https://ehrafworldcultures.yale.edu/document?id=ng06-016>

Densmore, F. (1929). Pawnee music. In *Bulletin* (Issue 93, pp. xviii, 129 , plates). U.S. Govt. Print. Off. https://ehrafworldcultures.yale.edu/document?id=nq18-003

Dentan, R. K. (1988). *Some Senoi Semai dietary restrictions: a study of food behavior in a Malay hill tribe*. University Microfilms International. <https://ehrafworldcultures.yale.edu/document?id=an06-007>

Douglass, W. A. (1997). *Culture summary: Basque Americans*. HRAF. <https://ehrafworldcultures.yale.edu/document?id=n018-000>

Dugast, I. (1959). Monographie de la Tribu des Ndiki (Banen du Cameroun): Tome 2 -- Vie sociale et familiale. In *Travaux et mémoires de l’Institut d’ethnologie: Vol. v. 63* (pp. xx, 635). Institut d’ethnologie. <https://ehrafworldcultures.yale.edu/document?id=fh26-002>

Dyson-Hudson, R., & McCabe, J. T. (1985). South Turkana nomadism: coping with an unpredictably varying environment. In *HRAFlex books, ethnography series* (pp. 10, 378). Human Relations Area Files. <https://ehrafworldcultures.yale.edu/document?id=fl17-003>

Ebihara, M. (1971). *Svay: a Khmer village in Cambodia*. University Microfilms. <https://ehrafworldcultures.yale.edu/document?id=am04-192>

Elliott, M. C. (1999). Manchu widows and ethnicity in Qing China. *Comparative Studies in Society and History, 41*(1), 33–71.

Elwin, V. (1943). *Maria murder and suicide*. Pub. for Man in India by H. Milford, Oxford University Press. <https://ehrafworldcultures.yale.edu/document?id=aw32-003>

Ennew, J. (1980). The western Isles today. In *Changing cultures* (pp. 14, 128 , plates). Cambridge University Press. <https://ehrafworldcultures.yale.edu/document?id=es10-007>

Erlich, V. St. (1966). *Family in transition: a study of 300 Yugoslav villages*. Princeton University Press.

Evans-Pritchard, E. E. (1956). Nuer Religion. Oxford: Clarendon Press. <https://ehrafworldcultures.yale.edu/document?id=fj22-016>

Fenton, W. N., & Tooker, E. (1978). Mohawk. In *handbook of north american indians. northeast* (Vol. 15, pp. 466-480 [dc]). Smithsonian Institution. <https://ehrafworldcultures.yale.edu/document?id=nm09-045>

Field, M. J. (1970). *Search for security: an ethno-psychiatric study of rural Ghana*. Norton & Company, Inc.

Fowler, L. (1987). *Shared symbols contested meanings: Gros Ventre culture and history, 1778-1984*. Cornell University Press.

Fried, J. (1951). Ideal Norms and Social Control in Tarahumara Society. Yale University Press. New Haven. <https://ehrafworldcultures.yale.edu/document?id=nu33-010>

Frisbie, C. J. (1980). An approach to the ethnography of Navajo ceremonial performance. In *The Ethnography of musical performance [compiled by] Norma McLeod and Marcia Herndon* (pp. 75–104, 199–212). Norwood Editions. <https://ehrafworldcultures.yale.edu/document?id=nt13-300>

Fürer-Haimendorf, C. von. (1964). *The Sherpas of Nepal: Buddhist highlanders*. John Murray. <https://ehrafworldcultures.yale.edu/document?id=ak06-001>

Gallimore, R., & Howard, A. (1968). Introduction. In *studies in a hawaiian community : na makamaka o nanakuli* (Issue 1, pp. 1–9). Bernice P. Bishop Museum, Dept. of Anthropology. https://ehrafworldcultures.yale.edu/document?id=ov05-007

Gans, H. J. (1982). *The urban villagers: group and class in the life of Italian-Americans*. Free Press.

García, M. C. (1996). *Havana USA: Cuban exiles and Cuban Americans in South Florida, 1951-1994.* University of California Press.

Gelfand, M. (1981). *Ukama, reflections on Shona and Western cultures in Zimbabw*e. Mambo Press.

Gelfand, M., & Hannan, M. (1967). *The African witch: with particular reference to witchcraft beliefs and practices among the Shona of Rhodesia*. E. & S. Livingstone. https://ehrafworldcultures.yale.edu/document?id=fs05-012

Gillin, J. (1936). The Barama River Caribs of British Guiana. In *Papers of the Peabody Museum of American Archaeology and Ethnology* (Vol. 14, Issue 2, pp. xiv, 274 , 30 plates). The Museum. https://ehrafworldcultures.yale.edu/document?id=sr09-001

Goodale, J. C. (Jane C. (1971). Tiwi wives: a study of the women of Melville Island, North Australia. In *Monographs of the American Ethnological Society* (pp. xxiv, 368). University of Washington Press. https://ehrafworldcultures.yale.edu/document?id=oi20-014

Goodenough, W. H. (1986). Sky world and this world: the place of Kachaw in Micronesian cosmology. *American Anthropologist, 88*(3), 551–568.

Gorer, G. (1949). The psychology of Great Russians. In *The people of great Russia: a psychological study* (pp. 91–194). Cresset Press. https://ehrafworldcultures.yale.edu/document?id=rf10-096

Green, M. M. (1964). *Ibo village affairs*. Praeger.

Griaule, M. (1965). Conversation with Ogotemmêli. Oxford University Press.

Gusinde, M. (1931). The Fireland Indians: Vol. 1. The Selk’nam, on the life and thought of a hunting people of the Great Island of Tierra del Fuego. In *Expeditions* (pp. 32, 1176 , 51 plates). Verlag der Internationalen Zeitschrift. https://ehrafworldcultures.yale.edu/document?id=sh04-001

Gusinde, M., & Schütze, F. (1937). The Yahgan: the life and thought of the water nomads of Cape Horn. In *Die Feuerland-Indianer [The Fuegian Indians]: Vol. Vol. II* (p. HRAF: xv, 1471 [incomplete] [original: 365-1185, 1278-1499 ]). Anthropos-Bibliothek. https://ehrafworldcultures.yale.edu/document?id=sh06-001

Gutiérrez de Pineda, V., & Muirden, S. J. (1950). Social organization in La Guajira. In *Revista del Instituto Etnologico Nacional* (Vol. 3, Issue 2, p. HRAF ms: i-ix, 1-304 [Original: xvi, 255 ]). [s.n.]. https://ehrafworldcultures.yale.edu/document?id=sc13-001

Hadel, R. (1989). *Carib folk songs and Carib culture*. University Microfilms. https://ehrafworldcultures.yale.edu/document?id=sa12-009

Hambly, W. D. (1934). The Ovimbundu of Angola: Frederick H. Rawson-Field Museum ethnological expedition to West Africa, 1929-30; 84 plates in photogravure and 1 map. In *Anthropological series* (Vol. 21, Issue 2, pp. 89-362, plates). [s. n.]. https://ehrafworldcultures.yale.edu/document?id=fp13-003

Han, S. (1977). Korean Fishermen: Ecological Adaptation in Three Communities. Seoul: Seoul National University Press. <https://ehrafworldcultures.yale.edu/document?id=aa01-065>

Hanks, L. M. (Lucien M., & Hanks, J. R. (1950). Tribe under trust: a study of the Blackfoot Reserve of Alberta. University of Toronto Press. <https://ehrafworldcultures.yale.edu/document?id=nf06-016>

Hannan, D. (1979). Displacement and development: class, kinship, and social change in Irish rural communities. In Paper (Issue 96, p. 231). Economic and Social Research Institute. <https://ehrafworldcultures.yale.edu/document?id=er06-020>

Hansen, H. H. (1961). The Kurdish woman’s life: field rese Koltyk arch in a Muslim society, Iraq. In *Copenhagen Ethnographic Museum Record* (7). Nationalmuseet. <https://ehrafworldcultures.yale.edu/document?id=ma11-004>

Henriksen, G. (1973). Hunters in the barrens: the Naskapi on the edge of the White Man’s world. In *Newfoundland social and economic studies* (Issue 12, pp. 11, 130). Memorial University of Newfoundland. https://ehrafworldcultures.yale.edu/document?id=nh06-019

Hirschon, R. (1978). Open body/closed space: the transformation of female sexuality. In *defining females : the nature of women in society* (pp. 66–88). Wiley. https://ehrafworldcultures.yale.edu/document?id=eh01-059

Hirschon, R. (1989). *Heirs of the Greek catastrophe: the social life of Asia Minor refugees in Piraeus*. Clarendon Press ; Oxford University Press. https://ehrafworldcultures.yale.edu/document?id=eh01-058

Honigmann, J. J., & Bennett, W. C. (1949). Culture and ethos of Kaska society. In *Yale University publications in anthropology* (Issue 40, pp. 366, 12 plates). Yale University Press. https://ehrafworldcultures.yale.edu/document?id=nd12-001

Horne, L. (1994). Village spaces: settlement and society in northeastern Iran. In *Smithsonian series in archaeological inquiry* (pp. xvi, 246). Smithsonian Institution Press. https://ehrafworldcultures.yale.edu/document?id=ma01-080

Hostetler, J. A. (1980). Amish society. Johns Hopkins University Press.

Hostetler, J. A., & Huntington, G. E. (1971). Children in Amish society: socialization and community education. In *Case studies in education and culture* (pp. 16, 119). Holt, Rinehart and Winston. https://ehrafworldcultures.yale.edu/document?id=nm06-003

Howell, W. (1908–1910). The Sea Dyak. *The Sarawak Gazette*, *Vol. 38-40*, [HRAF pagination: 1-118]. https://ehrafworldcultures.yale.edu/document?id=oc06-002

Hulbert, H. B. (1906). *The passing of Korea*. Doubleday, Page and Co. <https://ehrafworldcultures.yale.edu/cultures/aa01/documents/001>

Hurh, W. M., & Kim, K. C. (1983). *Korean immigrants in America: a structural analysis of ethnic confinement and adhesive adaptation*. Associated University Presses. https://ehrafworldcultures.yale.edu/document?id=n019-003

Hutchinson, S. E. (1980). Relations between the Sexes among the Nuer: 1930. *Africa, 50*(4): 371–87.

Izady, Mehrdad R. 1992. The Kurds: A Concise Handbook. Washington, D.C.: Crane Russak, Taylor & Francis International Publishers. <https://ehrafworldcultures.yale.edu/document?id=ma11-012>.

Jacobs, E. D. (2003). *The Nehalem Tillamook: an ethnography*. Oregon State University Press.

Jankowiak, W. R. (2008). Co-wives, husband, and the Mormon polygynous family. *Ethnology, 47*(2/3), 177.

Jenness, D. (1935). The Ojibwa Indians of Parry Island, their social and religious life. In Bulletin (Issue 78, pp. vi, 115). National Museum of Canada, J. O. Patenaude, printer.

Jenness, D. (1959). *The People of the Twilight.* University of Chicago Press.

Kan, S. (1989). Symbolic immortality: the Tlingit potlatch of the nineteenth century. In *Smithsonian series in ethnographic inquiry* (pp. xi, 390). Smithsonian Institution Press. https://ehrafworldcultures.yale.edu/document?id=na12-032

Kayal, P. M., & Kayal, J. M. (1975). The Syrian-Lebanese in America: a study in religion and assimilation. In *The Immigrant Heritage of America series.* Twayne Pubs. <https://ehrafworldcultures.yale.edu/document?id=nk09-002>

Kennedy, John G. (1978). Tarahumara of the Sierra Madre: Beer, Ecology, and Social Organization. In *Worlds of Man*, viii, 245 [16]. Arlington Heights, Ill.: AHM Pub. Corp. <https://ehrafworldcultures.yale.edu/document?id=nu33-016>.

Kenyatta, J. (1953). *Facing Mount Kenya: the tribal life of the Gikuyu*. Secker and Warburg.

Kerns, V. (1983). *Women and the ancestors: Black Carib kinship and ritual.* University of Illinois Press.

Kiev, A. (1968). *Curanderismo; Mexican-American folk psychiatry*. Free Press.

Kilpatrick, Jack Frederick, and Anna Gritts Kilpatrick. (1965). Walk in Your Soul: Love Incantations of the Oklahoma Cherokees. Dallas: Southern Methodist University Press. <https://ehrafworldcultures.yale.edu/document?id=nn08-009>

Kilpatrick, J. F., & Kilpatrick, A. G. (1970). Notebook of a Cherokee shaman. In *Smithsonian contributions to anthropology: Vol. v. 2* (Issue 6, pp. vi, 83–125). Smithsonian Institution Press; [for sale by the Supt. of Docs., U.S. Govt. Print. Off.]. https://ehrafworldcultures.yale.edu/document?id=nn08-015

Klass, M. (1978). *From field to factory: community structure and industrialization in West Bengal*. Institute for the Study of Human Issues. https://ehrafworldcultures.yale.edu/document?id=aw69-007

Kohl, J. G. & Wraxall, L. (1860). *Kitchi-Gami: wanderings round Lake Superior*. Chapman & Hall. <https://ehrafworldcultures.yale.edu/document?id=ng06-020>

Koltyk, J. A. (1998). *New pioneers in the heartland: Hmong life in Wisconsin*. New immigrants series. Allyn and Bacon.

Krause, A., & Gunter, E. (1956). *The Tlingit Indians: results of a trip to the northwest coast of America and the Bering Straits*. Published for the American Ethnological Society by the University of Washington Press. <https://ehrafworldcultures.yale.edu/document?id=na12-001>

Kroeber, A. L. (Alfred Louis). (1925). Handbook of the Indians of California. In *Bulletin*, 1-97; plates. Washington: Government Printing Office. <https://ehrafworldcultures.yale.edu/document?id=ns31-009>

Lancaster, R. (1966). *Piegan: a look from within at the life, times, and legacy of an American Indian tribe*. Doubleday.

Lane, R. B. (1965). The Melanesians of South Pentecost, New Hebrides. In *gods ghosts and men in Melanesia; some religions of Australian new guinea and the New Hebrides* (pp. 250–279). Oxford University Press. <https://ehrafworldcultures.yale.edu/document?id=oo17-002>

Lee, D. (1977). A study of social networks within two Korean communities in America. In *The Korean diaspora : historical and sociological studies of Korean immigration and assimilation in North America* (pp. 155–166). ABC-Clio, Inc. https://ehrafworldcultures.yale.edu/document?id=n019-011

Lee, R. B. (1979). *The !Kung San: men, women, and work in a foraging society*. Cambridge University Press.

Leighton, D. (Cross), & Kluckhohn, C. (1947). *Children of the people: the Navaho individual and his development*. Harvard Univ. Press. https://ehrafworldcultures.yale.edu/document?id=nt13-002

Levine, D. N. (1965). *Wax & gold: tradition and innovation in Ethiopian culture*. University of Chicago Press.

LeVine, R. A., & Lloyd, B. B. (Barbara B. (1966). Nyansongo: a Gusii community in Kenya. In *Six cultures series: Vol. v. 2* (pp. xxxv, 204). Wiley. https://ehrafworldcultures.yale.edu/document?id=fl08-005

Lingenfelter, Sherwood Galen, and Ian A. Skoggard. (2006). Culture Summary: Yapese. New Haven, Conn.: HRAF. <https://ehrafworldcultures.yale.edu/document?id=or22-000>.

Lothrop, S. K. (1928). The Indians of Tierra del Fuego. In *Contributions* (Vol. 10, pp. 244, plates). Museum of the American Indian, Heye Foundation. <https://ehrafworldcultures.yale.edu/document?id=sh04-003>

Lowenberg, C. Y. (1984). *Identification and fulfillment of needs of the elderly on Skye, Scotland: a social network analysis*. Xerox University Microfilms. <https://ehrafworldcultures.yale.edu/document?id=es10-012>

Lurie, N. O. (2010). *Culture Summary: Winnebago/Ho-Chunk*. Human Relations Area Files. <https://ehrafworldcultures.yale.edu/document?id=np12-000>

Lutz, C. (1982). The domain of emotion words on Ifaluk. *American Ethnologist, 9*(1), 113–128.

Lynch, A., Detzner, D. T., & Eicher, J. (1995). Hmong American New Year rituals: generational bonds through dress. *Clothing and Textiles Research Journal, 13*(2), 111–120.

Mace, D. R. (1963). *The Soviet family*. Doubleday and Company.

Malinowski, B. (1929). *The sexual life of savages in northwestern Melanesia: Vol. 1 and 2*. Horace Liveright.

Marshall, L. (1961). Sharing, Talking, and Giving: Relief of Social Tensions among !Kung Bushmen. *Africa, 31*: 231–49.

Martin, E. (1981). *The anthropology of Taiwanese society*. Stanford University Press.

Maxwell, K. B. (Kevin B. (1983). Bemba myth and ritual: the impact of literacy on an oral culture. In *American university studies* (Vol. 2, pp. xxiii, 197). P. Lang. https://ehrafworldcultures.yale.edu/document?id=fq05-011

Mead, M. (1928). Coming of age in Samoa; a psychological study of primitive youth for western civilisation. W. Morrow & Company.

Merrill, W. L. (1988). Rarámuri souls: knowledge and social process in northern Mexico. In *Smithsonian series in ethnographic inquiry* (pp. xi, 237). Smithsonian Institution Press. https://ehrafworldcultures.yale.edu/document?id=nu33-014

Meyer, H., & Handzik, H. (1916). *The Barundi: an ethnological study of German East Africa*. Ott Spamer. https://ehrafworldcultures.yale.edu/document?id=fo58-001

Miller, D. R. (2002). *Culture summary: Assiniboine*. HRAF. https://ehrafworldcultures.yale.edu/document?id=nf04-000

Mintz, S. W. (1966). Puerto Rico: an essay in the definition of a national culture. In Status of Puerto Rico: selected background studies, prepared for the United States (pp. 339–434). U.S. Government Printing Office.

Mirak, R. (1983). Torn between two lands: Armenians in America, 1890 to World War I. In *Harvard Armenian texts and studies* (Issue 7, pp. xii, 364). Harvard University Press. https://ehrafworldcultures.yale.edu/document?id=n016-006

Miranda, M., Ruiz, R. A., Cuellar, I., Galarza, E., Korte, A. O., Martinez, C., Montiel, M., Newton, F. C.-R., Nuñez, F., Santos, R., Valle, R., Velez-I, C. G., Verdugo, R., & (U.S.), N. I. O. M. H. (1981). Chicano aging and mental health. In DHHS publication (pp. x, 279). U.S. Dept. of Health and Human Services, Public Health Service, Alcohol, Drug Abuse, and Mental Health Administration, National Institute of Mental Health.

Mluanda, M. (1971). Traditional practices among the Luguru in eastern Tanzania. *Bulletin of the International Committee on Urgent Anthropological and Ethnological Research*, *No. 13*, 57–65. <https://ehrafworldcultures.yale.edu/document?id=fn32-005>

Mooney, J. (1982). *Myths of the Cherokee: and sacred formulas of the Cherokees*. C. Elder-Bookseller.

Mountain Horse, M. (1979). *My people, the Bloods*. Glenbow-Alberta Institute ; Blood Tribal Council. <https://ehrafworldcultures.yale.edu/document?id=nf06-064>

Mulder, N. (1996). *Inside Thai Society: Interpretations of Everyday Life.* The Pepin Press.

Murphy, Y., & Murphy, R. F. (1985). *Women of the forest*. Columbia University Press.

Nadel, S. F. (1954). *Nupe religion*. Routledge & Paul.

Nader, L. (1990). *Harmony ideology: justice and control in a Zapotec mountain village*. Stanford University Press.

Naff, A. (1985). Becoming American: the early Arab immigrant experience. In *M.E.R.I. special studies* (pp. x, 376, plates). Southern Illinois University Press. <https://ehrafworldcultures.yale.edu/document?id=nk09-004>

Nassehi-Behnam, V. (1985). Change and the Iranian Family. *Current Anthropology*, 26(5):557–62. <https://ehrafworldcultures.yale.edu/document?id=ma01-077>

Nelson, L. (1952). *The Mormon village: a pattern and technique of land settlement*. University of Utah Press.

Nimmo, H. (1972). The sea people of Sulu: a study of social change in the Philippines. In *Studies in social and economic change* (pp. xi, 104). Chandler Pub. Co. <https://ehrafworldcultures.yale.edu/document?id=oa08-001>

Oliver, D. L. (1949). Human relations and language in a Papuan-speaking tribe of southern Bougainville, Solomon Islands: an essay on methodology. In *Studies in the anthropology of Bougainville, Solomon Islands: Vol. Vol. 29* (Issue No. 2, p. 38). The Museum. <https://ehrafworldcultures.yale.edu/document?id=on19-003>

Opler, M. E. (1969). Apache odyssey: a journey between two worlds. In *Case studies in cultural anthropology* (pp. 18, 301). Holt, Rinehart and Winston. <https://ehrafworldcultures.yale.edu/document?id=nt25-002>

Padilla, E. (1958). *Up from Puerto Rico*. Columbia University Press.

Pagés, G., & Scholl, B. (1933). A Hamitic kingdom in the center of Africa: in Ruanda on the shores of Lake Kivu (Belgian Congo). In *Mémoires: Vol. Vol. 1* (p. HRAF ms: v, 293 [original: iv, 704, 29 plates]). Libraire Falk fils, Georges van Campenhout, Successeur. <https://ehrafworldcultures.yale.edu/document?id=fo57-003>

Parman, S. (1990). Scottish crofters: an historical ethnography of a Celtic village. In Case studies in cultural anthropology (pp. xii, 175). Holt, Rinehart and Winston.

Peletz, M. G. (1988). *A share of the harvest: kinship, property, and social history among the Malays of Rembau*. University of California Press.

Perry, R. J. (1993). *Apache reservation: indigenous peoples and the American state*. University of Texas Press.

Phillips, H. P. (1966). *Thai peasant personality: the patterning of interpersonal behavior in the village of Bang Chan.* University of California Press.

Pineda Giraldo, R., & Muirden, S. J. (1950). Aspects of magic in La Guajira. In *Revista del Instituto Etnologico Nacional* (Vol. 3, Issue 1, p. HRAF ms: iii, 180 [Original: x, 164]). [s.n.]. <https://ehrafworldcultures.yale.edu/document?id=sc13-002>

Pollard, S. (1921). *In unknown China: a record of the observations, adventures and experiences of a pioneer missionary during a prolonged sojourn amongst the wild and unknown Nosu tribe of western China*. J.B. Lippincott Company. https://ehrafworldcultures.yale.edu/document?id=ae04-005

Pospisil, L. J. (1958). Kapauku Papuans and their law. In *Yale University publications in anthropology* (Issue 54, pp. 296, plates). Published for the Dept. Anthropology, Yale University. https://ehrafworldcultures.yale.edu/document?id=oj29-001

Powdermaker, H. (1933). *Life in Lesu: the study of a Melanesian Society in New Ireland*. W. W. Norton & Company, Inc. https://ehrafworldcultures.yale.edu/document?id=om24-001

Price, S. (1993). Co-wives and calabashes. In Women and culture (pp. xxxi, 224). University of Michigan Press. <https://ehrafworldcultures-yale-edu.are.uab.cat/document?id=sr15-001>

Rambo, A. T. (1982). *Vietnam: searching for integration. In religions and societies, Asia and the middle east*. Mouton.

Rasmussen, S. J. (1991). Modes of persuasion: gossip, song, and divination in Tuareg conflict resolution. *Anthropological Quarterly, 64*(1), 30–46.

Rasmussen, S. J. (2004). Reflections on witchcraft, danger, and modernity among the Tuareg. *Africa, 74*(3), 315–340.

Rathburn, R. R. (1988). *Processes of Russian-Tlingit acculturation in southeastern Alaska*. University Microfilms. https://ehrafworldcultures.yale.edu/document?id=na12-026

Rattray, R. S. (1927). *Religion and art in Ashanti*. Clarendon Press.

Raum, O. F. (1973). The social functions of avoidances and taboos among the Zulu. In *Monographien zur Völkerkunde* (pp. xiv, 576). de Gruyter. https://ehrafworldcultures.yale.edu/document?id=fx20-015

Reichard, G. A. (1950). *Navaho religion: a study of symbolism.* Bollinger Foundation.

Reid, J. P. (1970). *A law of blood: the primitive law of the Cherokee nation*. New York University Press.

Reiss, W. (Wilhelm). (1880). A Visit among the Jivaro Indians. *Verhandlungen Der Gesellschaft Für Erdkunde Zu Berlin*, *Vol. 7*, 325–337. https://ehrafworldcultures.yale.edu/document?id=sd09-033

Reynolds, B. (1963). Magic, divination and witchcraft among the Barotse of Northern Rhodesia. In *Robins series* (Issue 3, pp. 19, 181, plates). Chatto and Windus. https://ehrafworldcultures.yale.edu/document?id=fq09-009

Rick, K. (1990). *An investigation of the process of biculturation with Hmong refugees*. University Microfilms International. https://ehrafworldcultures.yale.edu/document?id=n009-007

Rongmuthu, D. S. (1960). The folk-tales of the Garos. In *Publication* (Issue 4, pp. 11, 392). University of Gauhati, Department of Publications. https://ehrafworldcultures.yale.edu/document?id=ar05-009

Routledge, D. (2020). *Culture Summary: Bau Fijians*. Human Relations Area Files. https://ehrafworldcultures.yale.edu/document?id=oq12-000

Sather, C. (1997). The Bajau Laut: adaptation, history, and fate in a maritime fishing society of south-east Sabah. In *South-East Asian social science monographs* (pp. xviii, 359). Oxford University Press. https://ehrafworldcultures.yale.edu/document?id=oa08-011

Schmalz, P. S. (1991). *The Ojibwa of southern Ontario*. University of Toronto Press.

Schulze, L. G., & Tepper, J. G. O. (1891). The aborigines of the upper and middle Finke River: their habits and customs, with introductory notes on the physical and natural-history features of the country. *Transactions and Proceedings and Reports of the Royal Society of South Australia*, *Vol. 14*, 210–246. https://ehrafworldcultures.yale.edu/document?id=oi08-027

Schwimmer, E. G. (1969). Cultural consequences of a volcanic eruption experienced by the Mount Lamington Orokaiva. In *University of Oregon. Dept. of Anthropology. Report* (Issue 9, pp. vii, 228, [26], 8). Dept. of Anthropology, University of Oregon. <https://ehrafworldcultures.yale.edu/document?id=oj23-022>

Scott Sir, J. G. (1910). The Burman: his life and notions. London: Macmillan and Co. <https://ehrafworldcultures.yale.edu/document?id=ap04-002>.

Shkilnyk, A. M. (1985). *A poison stronger than love: the destruction of an Ojibwa community*. Yale University Press. <https://ehrafworldcultures.yale.edu/document?id=ng06-075>

Sieroszewski, W. (1993). *The Yakut: an experiment in ethnographic research*. Assotsiatsiia “Rossiiskaia polit. entsiklopediia.” https://ehrafworldcultures.yale.edu/document?id=rv02-001

Silberbauer, G. B. (1965). *Report to the Government of Bechuanaland on the Bushman Survey*. Bechuanaland Government. https://ehrafworldcultures.yale.edu/document?id=fx10-036

Silva, A. B. A. da, & Lillios, I. (1962). The indigenous civilization of the Uaupés. In *Centro de Pesquisas de Iauareté* (p. HRAF MS: 749 [original: 496, plates]). Centro de Pesquisas de Iauareté. <https://ehrafworldcultures.yale.edu/document?id=sq19-004>

Simic, A. (1978). Winners and losers: aging Yugoslavs in a changing world. In *life’s career-aging : cultural variations on growing old* (pp. 77–105). Sage Publications. <https://ehrafworldcultures.yale.edu/document?id=n017-004>

Smith, E. L. (1987). *A study of acculturation in an Amish community.* University Microfilms.

Smithson, C. L. (1959). The Havasupai woman. In *Anthropological papers* (Issue 38, pp. viii, 170). University of Utah Press. <https://ehrafworldcultures.yale.edu/document?id=nt14-004>

Spiro, M. E. (1977). *Kinship and marriage in Burma: a cultural and psychodynamic analysis*. University of California Press.

Spiro, M. E. (1978). *Burmese supernaturalism*. Institute for the Study of Human Issues. <https://ehrafworldcultures.yale.edu/document?id=ap04-032>

Spring, M. A. (1989). Ethnopharmacologic analysis of medicinal plants used by Laotian Hmong refugees in Minnesota. *Journal of Ethnopharmacology*, *Vol. 26*, 65–91. <https://ehrafworldcultures.yale.edu/document?id=n009-038>

St. John, D. P. (1994). *The dream-vision experience of the Iroquois: its religious meaning*. University Microfilms International. https://ehrafworldcultures.yale.edu/document?id=nm09-062

Stirling, A. P. (1965). Turkish village. In *The Nature of human society series* (pp. xiv, 316). Weidenfeld and Nicolson. https://ehrafworldcultures.yale.edu/document?id=mb01-007

Strom, Y. (1993). *The Hasidim of Brooklyn: a photo essay*. Jason Aronson Inc. https://ehrafworldcultures.yale.edu/document?id=n011-015

Suárez, M. M. (1971). Terminology, alliance and change in Warao society. In *Nieuwe West-Indische Gids: Vol. Vol. 48* (pp. 56–122). Martinus Nijhoff. https://ehrafworldcultures.yale.edu/document?id=ss18-011

Suárez-Orozco, C., & Suárez-Orozco, M. M. (1995). *Transformations: immigration, family life, and achievement motivation among Latino adolescents*. Stanford University Press.

Taylor, D. M. (1951). The Black Carib of British Honduras. In *Publication in anthropology* (p. 185). Wenner-Gren Foundation for Anthropological Research, Inc. https://ehrafworldcultures.yale.edu/document?id=sa12-007

Taylor, L. J. (1981). Man the fisher”: salmon fishing and the expression of community in a rural Irish settlement. *American Ethnologist, 8*(4), 774–788

Thompson, R. H. (1989). Toronto’s Chinatown: the changing social organization of an ethnic community. In *Immigrant communities & ethnic minorities in the United States & Canada* (Issue 29, pp. xv, 430). AMS Press. https://ehrafworldcultures.yale.edu/document?id=nc04-003

Titiev, M. (1944). Old Oraibi: a study of the Hopi Indians of the Third Mesa. In *Papers* (Issue 1, pp. xi, 277, plates). Kraus Reprint Co. https://ehrafworldcultures.yale.edu/document?id=nt09-001

Titiev, M. (1972). *The Hopi Indians of Old Oraibi: change and continuity*. University of Michigan Press.

Tsai, S. H. (1986). The Chinese experience in America. In *Minorities in modern America* (pp. xv, 223). Indiana University Press. https://ehrafworldcultures.yale.edu/document?id=nk06-002

Tschopik Jr, H. (1951). The Aymara of Chucuito, Peru: 1. Magic. In *Anthropological papers* (Vol. 44, pp. 133-308, plates). American Museum of Natural History. https://ehrafworldcultures.yale.edu/document?id=sf05-002

Tseng, W. (1975). Traditional and modern psychiatric care in Taiwan. In *medicine in Chinese cultures : comparative studies of health care in Chinese and other societies* (pp. 177–194). U.S. Department of Health, Education, and Welfare, National Institutes of Health. https://ehrafworldcultures.yale.edu/document?id=ad05-061

Uchendu, V. C. (1965). The Igbo of southeast Nigeria. In *Case studies in cultural anthropology* (pp. xiii, 111). Rinehart and Winston. https://ehrafworldcultures.yale.edu/document?id=ff26-004

Underhill, R. (1946). *Papago Indian religion. In Contributions to Anthropology.* Columbia University Press.

Underhill, R. (1939). Social organization of the Papago Indians. In *Contributions to anthropology* (Issue 30, pp. xii, 280). Columbia University Press. https://ehrafworldcultures.yale.edu/document?id=nu79-002

Vélez-Ibáñez, C. G. (1996). *Border visions: Mexican cultures of the Southwest United States*. University of Arizona Press.

Warren, D. M. (1986). The Akan of Ghana: An Overview of the Ethnographic Literature. In Accra: Pointer Ltd. <https://ehrafworldcultures-yale-edu.are.uab.cat/document?id=fe12-029>.

Weiss, J. (1982). *Folk psychology of the Javanese of Ponorogo*. University Microfilms International. https://ehrafworldcultures.yale.edu/document?id=oe05-028

Weltfish, G. (1965). *The lost universe: with a closing chapter on “The universe regained.”* Basic Books. https://ehrafworldcultures.yale.edu/document?id=nq18-014

Whitten Jr, N. E. (2010). *Culture Summary: Canelos Quichua*. Human Relations Area Files. https://ehrafworldcultures.yale.edu/document?id=sd18-000

Wilbert, J., & Muirden, S. (1963). The Sanema. In *Indios de la región Orinoco-Ventuari, by Johannes Wilbert* (Issue 8, pp. 11–20, 177-236 [HRAF ms.: 1-115]). Fundación La Salle de Ciencias Naturales. https://ehrafworldcultures.yale.edu/document?id=sq18-004

Williams, F. E. (Francis E., & Murray, H.) (1930). *Orokaiva society*. Oxford University Press. https://ehrafworldcultures.yale.edu/document?id=oj23-001

Winzeler, R. L. (1991). LATAH in Sarawak, with special reference to the Iban. In *female and male in borneo : contributions and challenges to gender studies* (Vol. 1, pp. 317–333). The Borneo Research Council, Inc., Department of Anthropology, College of William and Mary. https://ehrafworldcultures.yale.edu/document?id=oc06-037

Wolf, A. P. (1969). *Marriage and adoption in a Hokkien village*. University Microfilms. https://ehrafworldcultures.yale.edu/document?id=ad05-002

Yves, d, & Métraux, A. (1864). *Journey made in the north of Brazil during the years 1613 and 1614*. A. Franck. <https://ehrafworldcultures.yale.edu/document?id=so09-007>

Zirakzadeh, C. E. (1989). Popular politics in the Basque region of Spain: a study in political anthropology. In *Publications* (pp. 3, 5, 381). University Microfilms International. https://ehrafworldcultures.yale.edu/document?id=ex08-010

Zingg, R. M. (Robert M. (1938). Report of the Mr. and Mrs. Henry Pfeiffer expedition for Huichol ethnography: the Huichols: primitive artists. In *Contributions to ethnography* (p. lxvi, 826). G.E. Stechert and Company. https://ehrafworldcultures.yale.edu/document?id=nu19-001
